# Supplementary material
Source: ML conference proceedings conference paper supplement (https://proceedings.mlr.press/v130/ding21b.html)
Supplement: Supplementary file 1 [file ding21b-supp.pdf]

## 8 SUPPLEMENTARY MATERIAL

### 8.1 Proof of Lemma 1

The proof of Lemma 1 is an adaptation from the proof of Theorem 1 in Li et al. (2017).

*Proof.* Define  $G(\theta) := \sum_{s=1}^t (\mu(X_s^T \theta) - \mu(X_s^T \theta^*)) X_s$ . We have  $G(\theta^*) = 0$  and  $G(\hat{\theta}_t) = \sum_{s=1}^t \epsilon_s X_s$ , where  $\epsilon_s$  is the sub-Gaussian noise at round  $s$ . For convenience, define  $Z := G(\hat{\theta}_t)$ . From mean value theorem, for any  $\theta_1, \theta_2$ , there exists  $v \in (0, 1)$  and  $\bar{\theta} = v\theta_1 + (1-v)\theta_2$  such that

$$G(\theta_1) - G(\theta_2) = \left[ \sum_{s=1}^t \mu'(X_s^T \bar{\theta}) X_s X_s^T \right] (\theta_1 - \theta_2) := F(\bar{\theta})(\theta_1 - \theta_2), \quad (11)$$

where  $F(\bar{\theta}) = \sum_{s=1}^t \mu'(X_s^T \bar{\theta}) X_s X_s^T$ . Therefore, for any  $\theta_1 \neq \theta_2$ , we have

$$(\theta_1 - \theta_2)^T (G(\theta_1) - G(\theta_2)) = (\theta_1 - \theta_2)^T F(\bar{\theta})(\theta_1 - \theta_2) > 0,$$

since  $\mu' > 0$  and  $\lambda_{\min}(V_{t+1}) > 0$ . So  $G(\theta)$  is an injection from  $\mathbb{R}^d$  to  $\mathbb{R}^d$ . Consider an  $\eta$ -neighborhood of  $\theta^*$ ,  $\mathbb{B}_\eta := \{\theta : \|\theta - \theta^*\| \leq \eta\}$ , where  $\eta$  is a constant that will be specified later such that we have  $c_\eta = \inf_{\theta \in \mathbb{B}_\eta} \mu'(x^T \theta) > 0$ . When  $\theta_1, \theta_2 \in \mathbb{B}_\eta$ , from the property of convex set, we have  $\bar{\theta} \in \mathbb{B}_\eta$ . From Equation 11, we have when  $\theta \in \mathbb{B}_\eta$ ,

$$\begin{aligned} \|G(\theta)\|_{V_{t+1}^{-1}} &= \|G(\theta) - G(\theta^*)\|_{V_{t+1}^{-1}} = \sqrt{(\theta - \theta^*)^T F(\bar{\theta}) V_{t+1}^{-1} F(\bar{\theta})(\theta - \theta^*)} \\ &\geq c_\eta \sqrt{\lambda_{\min}(V_{t+1})} \|\theta - \theta^*\| \end{aligned}$$

The last inequality is due to

$$F(\bar{\theta}) \succeq c_\eta \sum_{s=1}^t X_s X_s^T = c_\eta V_{t+1}.$$

From Lemma A in Chen et al. (1999), we have that

$$\left\{ \theta : \|G(\theta) - G(\theta^*)\|_{V_{t+1}^{-1}} \leq c_\eta \eta \sqrt{\lambda_{\min}(V_{t+1})} \right\} \subset \mathbb{B}_\eta.$$

Now from Lemma 7 in Li et al. (2017), we have with probability at least  $1 - \delta$ ,

$$\|G(\hat{\theta}_t) - G(\theta^*)\|_{V_{t+1}^{-1}} = \|Z\|_{V_{t+1}^{-1}} \leq 4R \sqrt{d + \log \frac{1}{\delta}}.$$

Therefore, when

$$\eta \geq \frac{4R}{c_\eta} \sqrt{\frac{d + \log \frac{1}{\delta}}{\lambda_{\min}(V_{t+1})}},$$

we have  $\hat{\theta}_t \in \mathbb{B}_\eta$ . Since  $c_\eta \geq c_1 \geq c_3 > 0$  when  $\eta \leq 1$ , we have

$$\|\hat{\theta}_t - \theta^*\| \leq \frac{4R}{c_\eta} \sqrt{\frac{d + \log \frac{1}{\delta}}{\lambda_{\min}(V_{t+1})}} \leq 1,$$

when  $\lambda_{\min}(V_{t+1}) \geq \frac{16R^2[d + \log(\frac{1}{\delta})]}{c_1^2}$ . □

### 8.2 Proof of Lemma 2

Note that the condition of Lemma 1 holds with high probability when  $\tau$  is chosen as Equation 8. This is a consequence of Proposition 1 in Li et al. (2017), which is presented below for reader's convenience.

**Proposition 1** (Proposition 1 in [Li et al. \(2017\)](#)). Define  $V_{n+1} = \sum_{t=1}^n X_t X_t^T$ , where  $X_t$  is drawn IID from some distribution in unit ball  $\mathbb{B}^d$ . Furthermore, let  $\Sigma := E[X_t X_t^T]$  be the second moment matrix, let  $B, \delta_2 > 0$  be two positive constants. Then there exists positive, universal constants  $C_1$  and  $C_2$  such that  $\lambda_{\min}(V_{n+1}) \geq B$  with probability at least  $1 - \delta_2$ , as long as

$$n \geq \left( \frac{C_1 \sqrt{d} + C_2 \sqrt{\log(1/\delta_2)}}{\lambda_{\min}(\Sigma)} \right)^2 + \frac{2B}{\lambda_{\min}(\Sigma)}.$$

Now we formally prove Lemma [2](#).

*Proof.* Note that from the definition of  $\tilde{\theta}_0$  in the algorithm, when  $j = 1$ , the conclusion holds trivially. When  $\tau$  is chosen as in Equation [8](#), we have from Lemma 1 and Proposition [1](#) that  $\|\tilde{\theta}_t - \theta^*\| \leq 1$  for all  $t \geq \tau$  with probability at least  $1 - \frac{2}{T^2}$ . Therefore,  $\hat{\theta}_{j\tau} \in \mathcal{C}$  for all  $j \geq 1$  with probability at least  $1 - \frac{2}{T^2}$ . For the analysis below, we assume  $\hat{\theta}_{j\tau} \in \mathcal{C}$  for all  $j \geq 1$ .

Since  $\tilde{\theta}_j \in \mathcal{C}$ , we have  $\|\tilde{\theta}_j - \theta^*\| \leq 3$ . Denote  $\mathbb{B}_\eta := \{\theta : \|\theta - \theta^*\| \leq \eta\}$ , we have  $\tilde{\theta}_j, \hat{\theta}_{j\tau} \in \mathbb{B}_3$ . For any  $v > 0$ , define  $\bar{\theta} = v\tilde{\theta}_j + (1-v)\hat{\theta}_{j\tau}$ , since  $\mathbb{B}_3$  is convex, we have  $\bar{\theta} \in \mathbb{B}_3$ . Therefore, we have from Assumption [2](#)

$$\nabla^2 l_{j,\tau}(\bar{\theta}) = \sum_{s=(j-1)\tau+1}^{j\tau} \mu'(X_s^T \bar{\theta}) X_s X_s^T \succeq c_3 \sum_{s=(j-1)\tau+1}^{j\tau} X_s X_s^T.$$

Since we update  $\tilde{\theta}_j$  every  $\tau$  rounds and  $\theta_j^{\text{TS}}$  only depends on  $\tilde{\theta}_j$ . For the next  $\tau$  rounds, the pulled arms are only dependent on  $\theta_j^{\text{TS}}$ . Therefore, the feature vectors of pulled arms among the next  $\tau$  rounds are IID. According to Proposition [1](#) and Equation [8](#), and by applying a union bound, we have  $\lambda_{\min} \left( \sum_{s=(j-1)\tau+1}^{j\tau} X_s X_s^T \right) \geq \frac{\alpha}{c_3}$  holds for all  $j \geq 1$  with probability at least  $1 - \frac{1}{T^2}$ . This tells us that for all  $j$ ,  $l_{j,\tau}(\theta)$  is a  $\alpha$ -strongly convex function when  $\theta \in \mathbb{B}_3$ . Therefore, we can apply (Theorem 3.3 of Section 3.3.1 in [Hazan et al. \(2016\)](#)) to get for all  $j \geq 1$

$$\sum_{q=1}^j \left( l_{q,\tau}(\tilde{\theta}_q) - l_{q,\tau}(\hat{\theta}_{q\tau}) \right) \leq \frac{G^2}{2\alpha} (1 + \log j)$$

where  $G$  satisfies  $G^2 \geq E\|\nabla l_{q,\tau}\|^2$ . Note that  $G \leq \tau$  since  $\mu(x) \in [0, 1]$ ,  $Y_s \in [0, 1]$  and  $\|X_s\| \leq 1$ . From Jensen's Inequality, we have

$$\sum_{q=1}^j \left( l_{q,\tau}(\bar{\theta}_j) - l_{q,\tau}(\hat{\theta}_{q\tau}) \right) \leq \frac{G^2}{2\alpha} (1 + \log j).$$

Since  $\tilde{\theta}_j, \hat{\theta}_{j\tau} \in \mathbb{B}_3$ , we have for any  $v > 0$ , if  $\theta = v\tilde{\theta}_j + (1-v)\hat{\theta}_{j\tau}$ , then  $\nabla^2 l_{q,\tau}(\theta) \succeq \alpha I_d$  for all  $1 \leq q \leq j$ . Since  $\sum_{q=1}^j \nabla l_{q,\tau}(\hat{\theta}_{q\tau}) = 0$ , we have

$$\|\bar{\theta}_j - \hat{\theta}_{j\tau}\| \leq \frac{G}{\alpha} \sqrt{\frac{1 + \log j}{j}}.$$

By applying a union bound, we get the conclusion.  $\square$

### 8.3 Proof of Lemma [3](#)

We utilize the concentration property of MLE. Here, we present the analysis of MLE in [Li et al. \(2017\)](#).

**Lemma 7** (Lemma 3 in [Li et al. \(2017\)](#)). Suppose  $\lambda_{\min}(V_{\tau+1}) \geq 1$ . For any  $\delta_3 \in (0, 1)$ , the following event

$$\mathcal{E} := \left\{ \|\hat{\theta}_t - \theta^*\|_{V_{t+1}} \leq \frac{R}{c_1} \sqrt{\frac{d}{2} \log\left(1 + \frac{2t}{d}\right) + \log \frac{1}{\delta_3}} \right\}$$

holds for all  $t \geq \tau$  with probability at least  $1 - \delta_3$ .

*Proof.* Note that from Proposition [1](#), when  $\alpha \geq c_3$ ,  $\lambda_{\min}(V_{\tau+1}) \geq 1$  holds with probability at least  $1 - \frac{1}{T^2}$ . The proof of Lemma [3](#) is simply a combination of Lemma [2](#) and Lemma [7](#) by applying a union bound.  $\square$

#### 8.4 Proof of Lemma 4

We use formula 7.1.13 in [Abramowitz and Stegun \(1948\)](#) to help derive the concentration and anti-concentration inequalities for Gaussian distributed random variables. Details are shown in [Lemma 8](#).

**Lemma 8** (Formula 7.1.13 in [Abramowitz and Stegun \(1948\)](#)). *For a Gaussian distributed random variable with mean  $m$  and variance  $\sigma^2$ , we have for  $z \geq 1$  that*

$$\mathbb{P}(|Z - m| \geq z\sigma) \leq \frac{1}{\sqrt{\pi}} e^{-\frac{z^2}{2}}.$$

For  $0 < z \leq 1$ , we have

$$\mathbb{P}(|Z - m| \geq z\sigma) \geq \frac{1}{2\sqrt{\pi}} e^{-\frac{z^2}{2}}.$$

Now we prove [Lemma 4](#).

*Proof.* Since  $\theta_j^{\text{TS}} | \mathcal{F}_{j\tau} \sim \mathcal{N}(\bar{\theta}_j, (2g_1(j)^2 \frac{c_3}{\alpha j} + \frac{2g_2(j)^2}{j}) I_d)$ , and  $\theta_j^{\text{TS}}$  is independent of  $\{\cup_{t=j\tau+1}^{(j+1)\tau} \mathcal{A}_t\} = \{x_{t,a}, a \in [K], j\tau < t \leq (j+1)\tau\}$ , we have for  $x \in \{\cup_{t=j\tau+1}^{(j+1)\tau} \mathcal{A}_t\}$ ,

$$x^T(\bar{\theta}_j - \theta_j^{\text{TS}}) | \mathcal{F}_{j\tau}, x \sim \mathcal{N}\left(0, \left(2g_1(j)^2 \frac{c_3}{\alpha j} + \frac{2g_2(j)^2}{j}\right) \|x\|^2\right).$$

From the property of Gaussian random variable in [Lemma 8](#), when  $u = \sqrt{2 \log(T^2 K \tau)}$ , we have

$$\mathbb{P}\left(|x^T(\bar{\theta}_j - \theta_j^{\text{TS}})| \geq u \sqrt{2g_1(j)^2 \frac{c_3}{\alpha j} \|x\|^2 + \frac{2g_2(j)^2}{j} \|x\|^2} \middle| \mathcal{F}_{j\tau}, x\right) \leq \frac{1}{\sqrt{\pi}} e^{-\frac{u^2}{2}} \leq \frac{1}{K\tau T^2}. \quad (12)$$

We use the following property of conditional probability

$$\int_x \mathbb{P}(E|X=x, \mathcal{F}) f(X=x|\mathcal{F}) dx = \mathbb{P}(E|\mathcal{F}), \quad (13)$$

where  $f(X=x|\mathcal{F})$  is the conditional *p.d.f* of a random variable  $X$  and  $E$  is an event. Combine [Equation 12](#) and [Equation 13](#), we have for every  $a \in [K]$  and  $j\tau < t \leq (j+1)\tau$ ,

$$\begin{aligned} & \mathbb{P}\left(|x_{t,a}^T(\bar{\theta}_j - \theta_j^{\text{TS}})| \geq u \sqrt{2g_1(j)^2 \frac{c_3}{\alpha j} + 2g_2(j)^2/j} \|x_{t,a}\|^2 \middle| \mathcal{F}_{j\tau}\right) \\ &= \int_x \mathbb{P}\left(|x_{t,a}^T(\bar{\theta}_j - \theta_j^{\text{TS}})| \geq u \sqrt{2g_1(j)^2 \frac{c_3}{\alpha j} + 2g_2(j)^2/j} \|x_{t,a}\|^2 \middle| \mathcal{F}_{j\tau}, x_{t,a} = x\right) f(x_{t,a} = x | \mathcal{F}_{j\tau}) dx \\ &\leq \frac{1}{K\tau T^2} \int_x f(x_{t,a} = x | \mathcal{F}_{j\tau}) dx = \frac{1}{K\tau T^2} \end{aligned}$$

Applying a union bound, we get the conclusion. □

#### 8.5 Proof of Lemma 5

*Proof.* We still use [Lemma 8](#) to show the result. For convenience, denote  $x := x_{t,*}$ ,  $\gamma_1 := \sqrt{\frac{c_3}{\alpha j_t}} \|x\|$  and  $\gamma_2 := \frac{\|x\|}{\sqrt{j_t}}$ . Note that  $x$  is independent of  $\theta_{j_t}^{\text{TS}}$ , so

$$x^T(\bar{\theta}_{j_t} - \theta_{j_t}^{\text{TS}}) | \mathcal{F}_{j_t\tau}, x \sim \mathcal{N}\left(0, (2g_1(j_t)^2 \gamma_1^2 + 2g_2(j_t)^2 \gamma_2^2)\right). \quad (14)$$

Therefore,

$$\begin{aligned}
 \mathbb{P}(x^T \theta_{j_t}^{\text{TS}} > x^T \theta^* | \mathcal{F}_{j_t \tau}, x) &= \mathbb{P}\left(\frac{x^T \theta_{j_t}^{\text{TS}} - x^T \bar{\theta}_{j_t}}{\sqrt{2g_1(j_t)^2 \gamma_1^2 + 2g_2(j_t)^2 \gamma_2^2}} > \frac{x^T \theta^* - x^T \bar{\theta}_{j_t}}{\sqrt{2g_1(j_t)^2 \gamma_1^2 + 2g_2(j_t)^2 \gamma_2^2}} \middle| \mathcal{F}_{j_t \tau}, x\right) \\
 &\geq \mathbb{P}\left(\frac{x^T \theta_{j_t}^{\text{TS}} - x^T \bar{\theta}_{j_t}}{\sqrt{2g_1(j_t)^2 \gamma_1^2 + 2g_2(j_t)^2 \gamma_2^2}} > \frac{g_1(j_t) \|x\|_{V_{j_t \tau+1}^{-1}} + g_2(j_t) \frac{\|x\|}{\sqrt{j_t}}}{\sqrt{2g_1(j_t)^2 \gamma_1^2 + 2g_2(j_t)^2 \gamma_2^2}} \middle| \mathcal{F}_{j_t \tau}, x\right) \\
 &\geq \mathbb{P}\left(\frac{x^T \theta_{j_t}^{\text{TS}} - x^T \bar{\theta}_{j_t}}{\sqrt{2g_1(j_t)^2 \gamma_1^2 + 2g_2(j_t)^2 \gamma_2^2}} > \frac{g_1(j_t) \sqrt{\frac{c_3}{\alpha j_t}} \|x\| + g_2(j_t) \frac{\|x\|}{\sqrt{j_t}}}{\sqrt{2g_1(j_t)^2 \gamma_1^2 + 2g_2(j_t)^2 \gamma_2^2}} \middle| \mathcal{F}_{j_t \tau}, x\right) \\
 &\geq \frac{1}{4\sqrt{\pi}} e^{-\frac{z^2}{2}},
 \end{aligned}$$

where  $z := \frac{g_1(j_t)\gamma_1 + g_2(j_t)\gamma_2}{\sqrt{2g_1(j_t)^2\gamma_1^2 + 2g_2(j_t)^2\gamma_2^2}}$ . The first and second inequalities hold since  $\mathcal{F}_t$  is a filtration such that  $E_1(j_t)$  and  $\lambda_{\min}(V_{j_t \tau+1}) \geq \frac{\alpha j_t}{c_3}$  are true. Notice that we have  $0 < z \leq 1$  since

$$2g_1(j_t)^2\gamma_1^2 + 2g_2(j_t)^2\gamma_2^2 - (g_1(j_t)\gamma_1 + g_2(j_t)\gamma_2)^2 = (g_1(j_t)\gamma_1 - g_2(j_t)\gamma_2)^2 \geq 0.$$

Therefore, we get

$$\mathbb{P}(x^T \theta_{j_t}^{\text{TS}} > x^T \theta^* | \mathcal{F}_{j_t \tau}, x) \geq \frac{1}{4\sqrt{\pi}} e^{-\frac{z^2}{2}} \geq \frac{1}{4\sqrt{\pi e}}.$$

Similarly, using Equation [13](#), we get

$$\mathbb{P}(x_{t,*}^T \theta_{j_t}^{\text{TS}} > x_{t,*}^T \theta^* | \mathcal{F}_{j_t \tau}) = \int_x \mathbb{P}(x_{t,*}^T \theta_{j_t}^{\text{TS}} > x_{t,*}^T \theta^* | \mathcal{F}_{j_t \tau}, x_{t,*} = x) f(x_{t,*} = x | \mathcal{F}_{j_t \tau}) dx \geq \frac{1}{4\sqrt{\pi e}}.$$

□

## 8.6 Proof of Lemma [6](#)

The technique used in this proof is extracted from [Agrawal and Goyal \(2013\)](#); [Kveton et al. \(2019\)](#).

*Proof.* Denote  $\mathbb{E}_t[\cdot] := \mathbb{E}[\cdot | \mathcal{F}_t]$ . To prove the lemma, we prove the following Equation [15](#) holds for any possible filtration  $\mathcal{F}_t$ :

$$\mathbb{E}_{j_t \tau}[\Delta_{a_t}(t) \mathbb{1}(E_1(j_t) \cap E_2(j_t) \cap E_3(j_t))] \leq \left(1 + \frac{2}{\frac{1}{4\sqrt{\pi e}} - \frac{1}{T^2}}\right) \mathbb{E}_{j_t \tau}[H_{a_t}(t) \mathbb{1}(E_3(j_t))] \quad (15)$$

Denote the following set as the under-sampled arms at round  $t$ ,

$$S_t^C = \{i \in [K] : H_i(t) \geq \Delta_i(t)\}$$

Note that  $a_t^* \in S_t^C$  for all  $t$ . The set of sufficiently sampled arms is  $S_t = [K] \setminus S_t^C$ . Let  $J_t = \operatorname{argmin}_{i \in S_t^C} H_i(t)$  be the least uncertain under-sampled arm at round  $t$ . At round  $t$ , denote  $j_t = \lfloor \frac{t-1}{\tau} \rfloor$ . In the steps below, we assume that event  $E_1(j_t) \cap E_2(j_t)$  occurs, then

$$\begin{aligned}
 \Delta_{a_t}(t) &= \Delta_{J_t}(t) + (x_{t,J_t} - X_t)^T \theta^* \\
 &= \Delta_{J_t}(t) + x_{t,J_t}^T (\theta^* - \theta_{j_t}^{\text{TS}}) + (x_{t,J_t} - X_t)^T \theta_{j_t}^{\text{TS}} + X_t^T (\theta_{j_t}^{\text{TS}} - \theta^*) \\
 &\leq \Delta_{J_t}(t) + H_{J_t}(t) + H_{a_t}(t) \quad \text{since } (x_{t,J_t} - X_t)^T \theta_{j_t}^{\text{TS}} \leq 0 \\
 &\leq 2H_{J_t}(t) + H_{a_t}(t) \quad \text{since } J_t \in S_t^C.
 \end{aligned}$$

The left to do is to bound  $H_{J_t}(t)$  by  $H_{a_t}(t)$ . Since  $J_t = \operatorname{argmin}_{i \in S_t^C} H_i(t)$ , we have

$$\mathbb{E}_{j_t \tau}[H_{a_t}(t)] \geq \mathbb{E}_{j_t \tau}[H_{a_t}(t) | a_t \in S_t^C] \mathbb{P}(a_t \in S_t^C | \mathcal{F}_{j_t \tau}) \geq \mathbb{E}_{j_t \tau}[H_{J_t}(t)] \mathbb{P}(a_t \in S_t^C | \mathcal{F}_{j_t \tau}). \quad (16)$$

Therefore, we have

$$\mathbb{E}_{j_t\tau} [\Delta_{a_t}(t)\mathbb{1}(E_1(j_t) \cap E_2(j_t))] \leq \left(1 + \frac{2}{P(a_t \in S_t^C | \mathcal{F}_{j_t\tau})}\right) \mathbb{E}_{j_t\tau} [H_{a_t}(t)] \quad (17)$$

Next, we bound  $P(a_t \in S_t^C | \mathcal{F}_{j_t\tau})$ .

$$\begin{aligned} \mathbb{P}(a_t \in S_t^C | \mathcal{F}_{j_t\tau}) &\geq \mathbb{P}\left(x_{t,*}^T \theta_{j_t}^{\text{TS}} \geq \max_{i \in S_t} x_{t,i}^T \theta_{j_t}^{\text{TS}} \middle| \mathcal{F}_{j_t\tau}\right) \quad \text{since } a_t^* \in S_t^C \\ &\geq \mathbb{P}\left(x_{t,*}^T \theta_{j_t}^{\text{TS}} \geq \max_{i \in S_t} x_{t,i}^T \theta_{j_t}^{\text{TS}}, E_1(j_t) \cap E_2(j_t) \middle| \mathcal{F}_{j_t\tau}\right) \end{aligned} \quad (18)$$

$$\begin{aligned} &\geq \mathbb{P}\left(x_{t,*}^T \theta_{j_t}^{\text{TS}} \geq x_{t,*}^T \theta^*, E_1(j_t) \cap E_2(j_t) \middle| \mathcal{F}_{j_t\tau}\right) \\ &\geq \mathbb{P}\left(x_{t,*}^T \theta_{j_t}^{\text{TS}} \geq x_{t,*}^T \theta^*, E_1(j_t) \middle| \mathcal{F}_{j_t\tau}\right) - \mathbb{P}(E_2^C(j_t) | \mathcal{F}_{j_t\tau}) \\ &\geq \mathbb{P}\left(x_{t,*}^T \theta_{j_t}^{\text{TS}} \geq x_{t,*}^T \theta^*, E_1(j_t) \middle| \mathcal{F}_{j_t\tau}\right) - \frac{1}{T^2}. \end{aligned} \quad (19)$$

Inequality [18](#) holds because for all  $i \in S_t$ , on event  $E_1(j_t) \cap E_2(j_t)$ ,

$$x_{t,i}^T \theta_{j_t}^{\text{TS}} \leq x_{t,i}^T \theta^* + H_i(t) < x_{t,i}^T \theta^* + \Delta_i(t) = x_{t,*}^T \theta^*.$$

Inequality [19](#) holds because of Lemma [4](#). When  $\mathcal{F}_t$  is a filtration such that  $E_1(j_t)$  and  $E_3(j_t)$  are true, we have from Lemma [5](#) that

$$\mathbb{P}(a_t \in S_t^C | \mathcal{F}_{j_t\tau}) \geq \frac{1}{4\sqrt{\pi e}} - \frac{1}{T^2}.$$

So under such filtration, from Equation [17](#), we have

$$\mathbb{E}_{j_t\tau} [\Delta_{a_t}(t)\mathbb{1}(E_1(j_t) \cap E_2(j_t))] \leq \left(1 + \frac{2}{\frac{1}{4\sqrt{\pi e}} - \frac{1}{T^2}}\right) \mathbb{E}_{j_t\tau} [H_{a_t}(t)].$$

Since  $E_3(j_t)$  is  $\mathcal{F}_{j_t\tau}$ -measurable, we have under such filtration,

$$\mathbb{E}_{j_t\tau} [\Delta_{a_t}(t)\mathbb{1}(E_1(j_t) \cap E_2(j_t) \cap E_3(j_t))] \leq \left(1 + \frac{2}{\frac{1}{4\sqrt{\pi e}} - \frac{1}{T^2}}\right) \mathbb{E}_{j_t\tau} [H_{a_t}(t)\mathbb{1}(E_3(j_t))].$$

When  $\mathcal{F}_t$  is a filtration such that  $E_1(j_t) \cap E_3(j_t)$  is not true, the conclusion holds trivially. This finishes our proof.  $\square$

## 8.7 Proof of Theorem [1](#)

Before proving the theorem, we show a lemma below.

**Lemma 9.** *Let  $J = \lfloor \frac{T}{\tau} \rfloor$ , then*

$$\mathbb{E} \left[ \sum_{t=\tau+1}^T H_{a_t}(t)\mathbb{1}(E_3(j_t)) \right] \leq \sqrt{\tau T} \left( 2g_1(J) \sqrt{\frac{c_3}{\alpha}} + 2g_2(J) + u \sqrt{2g_1(J)^2 \frac{c_3}{\alpha} + 2g_2(J)^2 \sqrt{1 + \log J}} \right).$$

*Proof.* We know  $H_{a_t}(t) = H_{a_t,1}(t) + H_{a_t,2}(t) + H_{a_t,3}(t)$  from definition, where

$$\begin{aligned} H_{i,1}(t) &= g_1(j_t) \|x_{t,i}\|_{V_{j_t\tau+1}^{-1}}, \quad H_{i,2}(t) = g_2(j_t) \frac{\|x_{t,i}\|}{\sqrt{j_t}}, \\ H_{i,3}(t) &= u \sqrt{2g_1(j_t)^2 \frac{c_3}{\alpha j_t} \|x_{t,i}\|^2 + 2g_2(j_t)^2 \frac{\|x_{t,i}\|^2}{j_t}} \end{aligned}$$

For all  $t$ , we have  $j_t \leq \lfloor \frac{T}{\tau} \rfloor$  and so  $g_1(j_t) \leq g_1(J)$ , and  $g_2(j_t) \leq g_2(J)$ . Since  $\|X_t\|_{V_{j\tau+1}^{-1}}^2 \leq \lambda_{\max}(V_{j\tau+1}^{-1})\|X_t\|^2 \leq \frac{c_3}{\alpha j}$  when  $E_3(j)$  holds, we have

$$\mathbb{E} \left[ \sum_{t=\tau+1}^T H_{a_{t,1}}(t) \mathbb{1}(E_3(j_t)) \right] \leq 2\tau g_1(J) \sqrt{\frac{c_3}{\alpha}} J \leq 2g_1(J) \sqrt{\frac{c_3 \tau}{\alpha}} \sqrt{T}. \quad (20)$$

We also have

$$\sum_{t=\tau+1}^T H_{a_{t,2}}(t) \leq g_2(J) \sum_{t=\tau+1}^T \frac{\|X_t\|}{\sqrt{j_t}} \leq 2g_2(J) \sqrt{\tau T}. \quad (21)$$

From Cauchy-Schwarz, we have

$$\begin{aligned} \sum_{t=\tau+1}^T H_{a_{t,3}}(t) &\leq u\sqrt{T} \sqrt{\sum_{t=\tau+1}^T 2g_1(j_t)^2 \frac{c_3}{\alpha j_t} \|X_t\|^2 + 2g_2(j_t)^2 \frac{\|X_t\|^2}{j_t}} \\ &\leq u\sqrt{T} \sqrt{2g_1(J)^2 \frac{c_3 T}{\alpha} (1 + \log J) + 2g_2(J)^2 \tau (1 + \log J)}. \end{aligned} \quad (22)$$

Combine Equation [20](#), [21](#), [22](#), we get the conclusion.  $\square$

Now we formally prove Theorem [1](#).

*Proof.* Since

$$\begin{aligned} \mathbb{E}_{j_t \tau} [\mu(x_{t,*}^T \theta^*) - \mu(X_t^T \theta^*)] &\leq \mathbb{E}_{j_t \tau} [(\mu(x_{t,*}^T \theta^*) - \mu(X_t^T \theta^*)) \mathbb{1}(E_2(j_t))] + \mathbb{P}(E_2^C(j_t) | \mathcal{F}_{j_t \tau}) \\ &\leq \mathbb{E}_{j_t \tau} [(\mu(x_{t,*}^T \theta^*) - \mu(X_t^T \theta^*)) \mathbb{1}(E_2(j_t))] + \frac{1}{T^2}, \end{aligned}$$

we have

$$\mathbb{E} [\mu(x_{t,*}^T \theta^*) - \mu(X_t^T \theta^*)] \leq \mathbb{E} [(\mu(x_{t,*}^T \theta^*) - \mu(X_t^T \theta^*)) \mathbb{1}(E_2(j_t))] + \frac{1}{T^2}$$

From Proposition [1](#), when  $\tau$  is chosen as in Equation [8](#),  $E_3(j_t)$  holds with probability with at least  $1 - \frac{1}{T^2}$  for every  $t$ . From the above,

$$\begin{aligned} \mathbb{E}[R(T)] &= \sum_{t=1}^T \mathbb{E} [\mu(x_{t,*}^T \theta^*) - \mu(X_t^T \theta^*)] \leq \sum_{t=1}^T \mathbb{E} [(\mu(x_{t,*}^T \theta^*) - \mu(X_t^T \theta^*)) \mathbb{1}(E_2(j_t))] + \frac{1}{T} \\ &\leq \mathbb{E} \left[ \sum_{t=1}^T (\mu(x_{t,*}^T \theta^*) - \mu(X_t^T \theta^*)) \mathbb{1}(E_1(j_t) \cap E_2(j_t) \cap E_3(j_t)) \right] + \sum_{t=1}^T \mathbb{P}(E_1^C(j_t) \cup E_3^C(j_t)) + \frac{1}{T} \\ &\leq \tau + L_\mu \sum_{t=\tau+1}^T \mathbb{E} [\Delta_{a_t}(t) \mathbb{1}(E_1(j_t) \cap E_2(j_t) \cap E_3(j_t))] + \frac{7}{T} \\ &\leq \tau + pL_\mu \sum_{t=\tau+1}^T \mathbb{E} [H_{a_t}(t) \mathbb{1}(E_3(j_t))] + \frac{7}{T} \quad \text{from Lemma [6](#)} \end{aligned}$$

From Lemma [9](#), we have

$$\mathbb{E}[R(T)] \leq \tau + L_\mu p \sqrt{\tau T} \left[ 2\sqrt{\frac{c_3}{\alpha}} g_1(J) + 2g_2(J) + u\sqrt{\frac{2c_3 g_1(J)^2}{\alpha} + 2g_2(J)^2} \sqrt{1 + \log \lfloor \frac{T}{\tau} \rfloor} \right] + \frac{7}{T}.$$

This ends our proof.  $\square$
